# Supplementary material
Source: HighWire-hosted journal article supplement (http://www.jneurosci.org/highwire/filestream/601329/field_highwire_adjunct_files/0/Supplemental_Figures.pdf)
Supplement: Supplemental_Figures.pdf [file Supplemental_Figures.pdf]

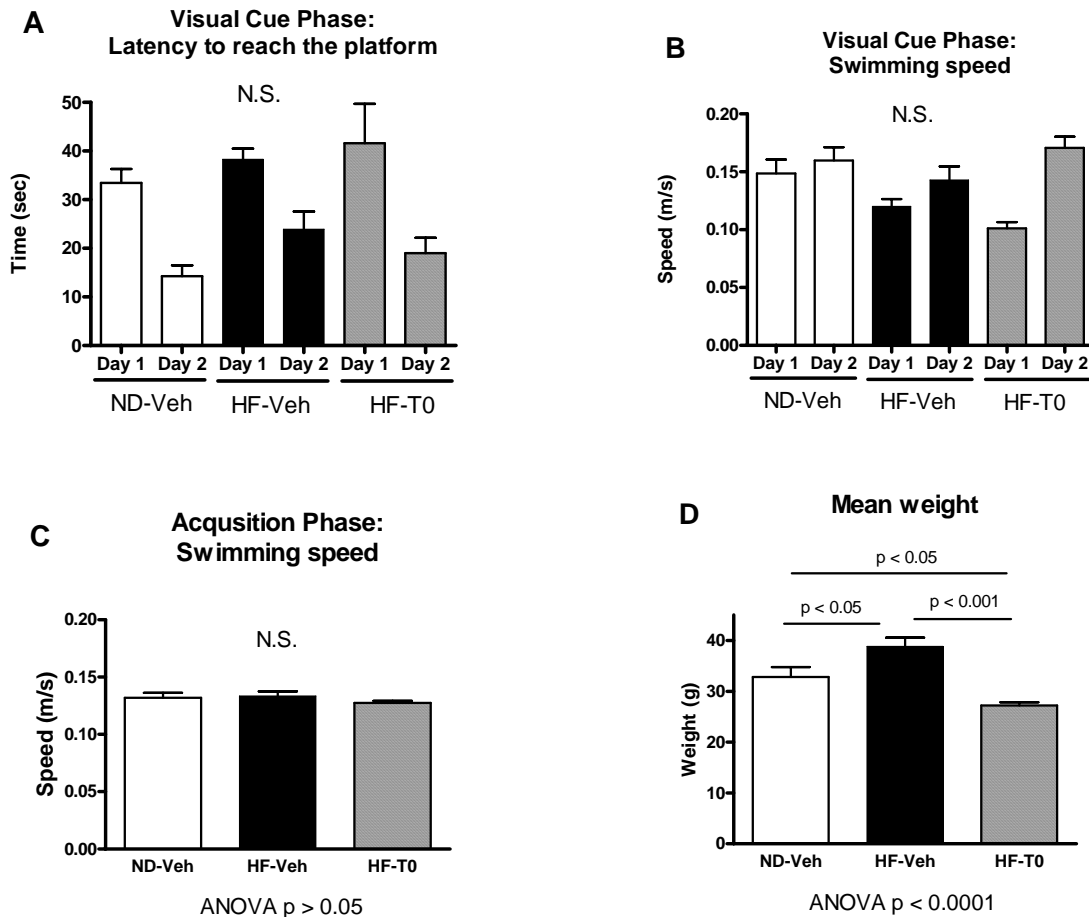

**Supplementary Figure 1: High fat diet and T0 treatment did not affect the motivation or swimming speed but changed the weight of treated APP23 mice. A and B,** High fat diet and T0 treatment did not affect the performance of APP23 mice during the visual cue phase of training in the MWM. **A**, There is no difference in the latency to reach the visual platform suggesting that motivation of the treated mice is not affected. **B and C**, Swimming speed during the visual cue phase (**B**) and during the acquisition phase of training in the MWM (**C**) suggests that there is no effect of treatment on locomotor activity of APP23 mice. **D**, High fat diet increases body weight in vehicle treated mice compared to mice on normal diet ( $p < 0.05$ ). T0 treatment significantly decreases weight compared to HF-Veh and normal diet (for both  $p < 0.05$ ). ND-Veh, normal diet vehicle; HF-Veh, high cholesterol/high fat diet vehicle; HF-T0, high cholesterol diet supplemented with T0. Analysis by one-way ANOVA followed by Tukey's post-test. Bars represent means  $\pm$  S.E.M. N=8-14 mice per group. N.S., no significance.

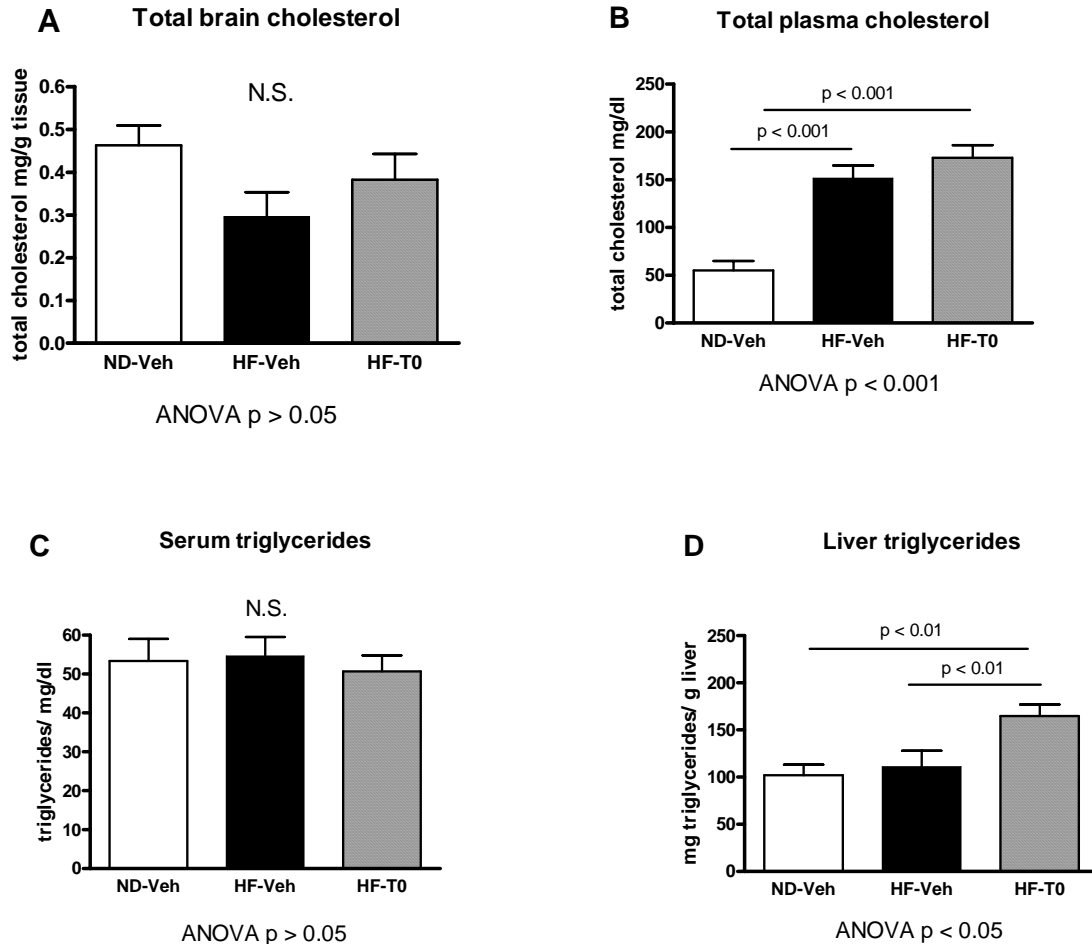

**Supplementary Figure 2: High fat diet increases the level of total cholesterol in plasma but not in the brain.** **A**, Total brain cholesterol is unchanged as a result of high fat/high cholesterol diet. **B**, Total plasma cholesterol is increased as a result of high fat/high cholesterol diet. **C**, Serum triglycerides are not affected by LXR ligand treatment; **D**, Liver triglycerides are increased after T0 treatment. ND-Veh, normal diet vehicle; HF-Veh, high cholesterol/high fat diet vehicle; HF-T0, high cholesterol diet supplemented with T0. Analysis by one-way ANOVA and Newman-Keuls post-test. Bars represent means  $\pm$  S.E.M. N=12-19 mice per group. N.S., no significance.

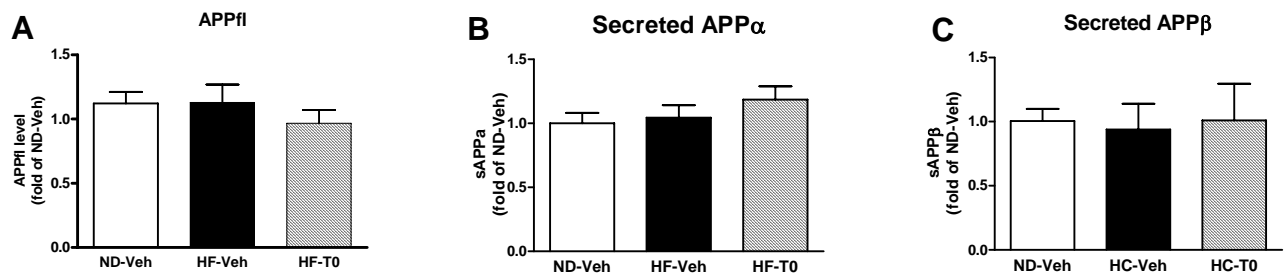

**Supplementary Figure 3: High fat diet does not affect APP processing.** Soluble proteins were extracted from cortices and hippocampi of APP23 mice on normal diet plus vehicle (ND-Veh) and mice on HF diet treated with vehicle (HF-Veh) or T0 (HF-T0) and APP processing was determined by WB as described in the text. **A**, Full length APP (APPfl); **B** and **C**, soluble fragments result of  $\alpha$ - and  $\beta$ -secretase cleavage (sAPP $\alpha$  and sAPP $\beta$ ). N=8-10 mice per group. Analysis by one-way ANOVA and Newman-Keuls post-test. Bars represent means  $\pm$  S.E.M.

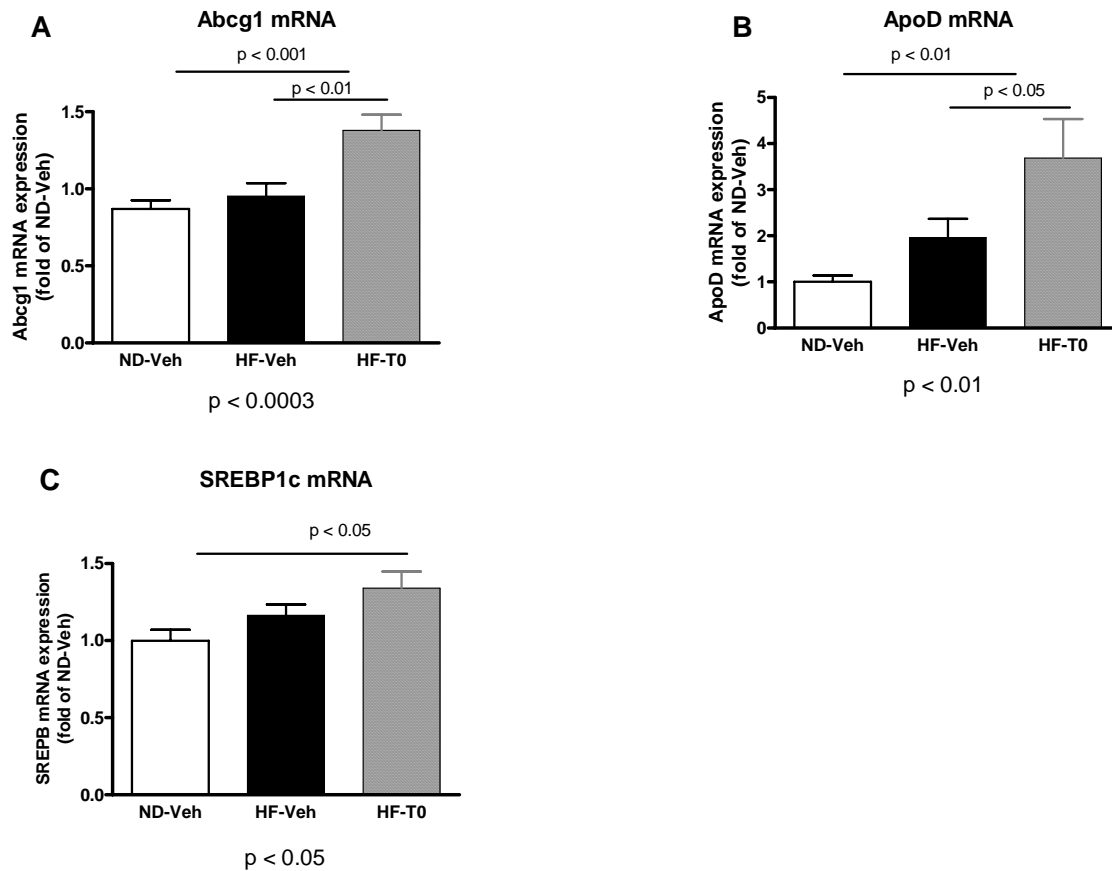

**Supplementary Figure 4: HF diet and LXR ligand T0 increase mRNA expression of LXR responsive genes in hippocampus of APP23 mice.** **A**, T0 increases Abcg1 mRNA in hippocampus. **B**, T0 increases ApoD mRNA in hippocampus. **C**, T0 increases SREBP1c in the hippocampus of mice on HF diet. ND-Veh, normal diet vehicle; HF-Veh, high cholesterol/high fat diet vehicle; HF-T0, high cholesterol diet supplemented with T0. Analysis by one-way ANOVA and Newman-Keuls post-test. Bars represent means  $\pm$  S.E.M. N=6-12 mice per group.

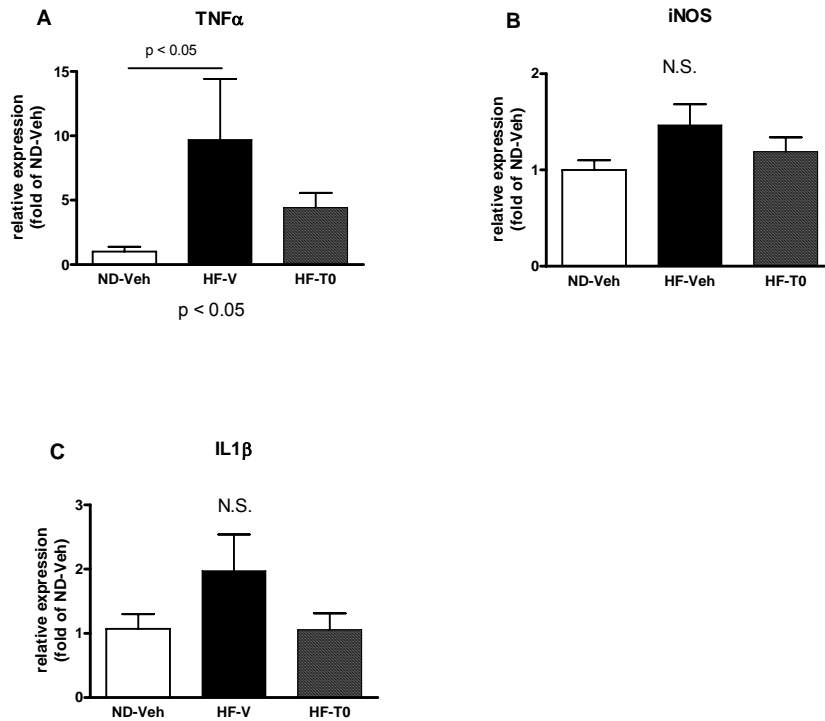

**Supplementary Figure 5: HF diet increase mRNA expression of some pro-inflammatory genes in cortex of APP23 mice.** **A**, HF increases TNF $\alpha$  mRNA compared to ND-Veh ( $p < 0.05$ ). HF-T0 shows a trend toward decrease versus HF-Veh but the difference is not statistically significant. **B**, iNOS mRNA level is not statistically different in all mice regardless of diets; **C**, IL1 $\beta$  mRNA level is not statistically different (N.S.) in mice on a ND and HF diets. Note that IL1 $\beta$  mRNA levels were very low in all samples and undetectable in few of the samples. Analysis by one-way ANOVA and Newman-Keuls post-test. Bars represent means  $\pm$  S.E.M. N=6-11 mice per group.

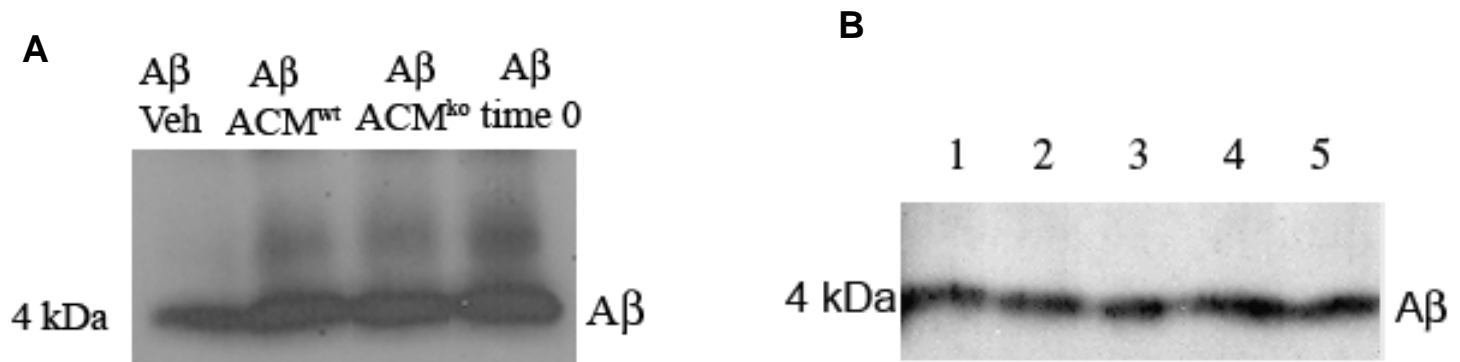

**Supplementary Figure 6: In the absence of microglia, ACM incubation does not increase A $\beta$ <sub>42</sub> degradation.** **A**, 0.5  $\mu$ M A $\beta$ <sub>42</sub> was incubated for 24 hours in the presence or absence of ACM from WT (ACM<sup>WT</sup>) or Abca1ko (ACM<sup>KO</sup>) astrocytes as described in the text. 6  $\mu$ l aliquots of A $\beta$  were resolved on a 4-12% Bis Tris NuPAGE gel and WB performed with 6E10 antibody. For comparison, on the right is shown A $\beta$  at the start of the incubation (time 0). Representative picture of one experiment in triplicate. **B**, 0.5  $\mu$ M A $\beta$ <sub>42</sub> was incubated for 24 hours in the presence of ACM<sup>WT</sup> treated with vehicle (2) or T0 (3); or ACM<sup>KO</sup> treated with vehicle (4) or T0 (5) as described in the text. A $\beta$ <sub>42</sub> incubated for 24 hours without ACM and only with vehicle is shown on lane 1. Representative picture of two experiments in duplicate. For **A** and **B**, note the lack of difference between A $\beta$ <sub>42</sub> incubated only with vehicle and A $\beta$ <sub>42</sub> incubated with ACM.
